# Supplementary material for: Flow Density in Optical Coherence Tomography Angiography is Useful for Retinopathy Diagnosis in Diabetic Patients
Source: PubMed Central journal article supplement (PMC6572797; doi:10.1038/s41598-019-45194-z), 2019-06-17
Supplement: 41598_2019_45194_MOESM1_ESM.pdf [file 41598_2019_45194_MOESM1_ESM.pdf]

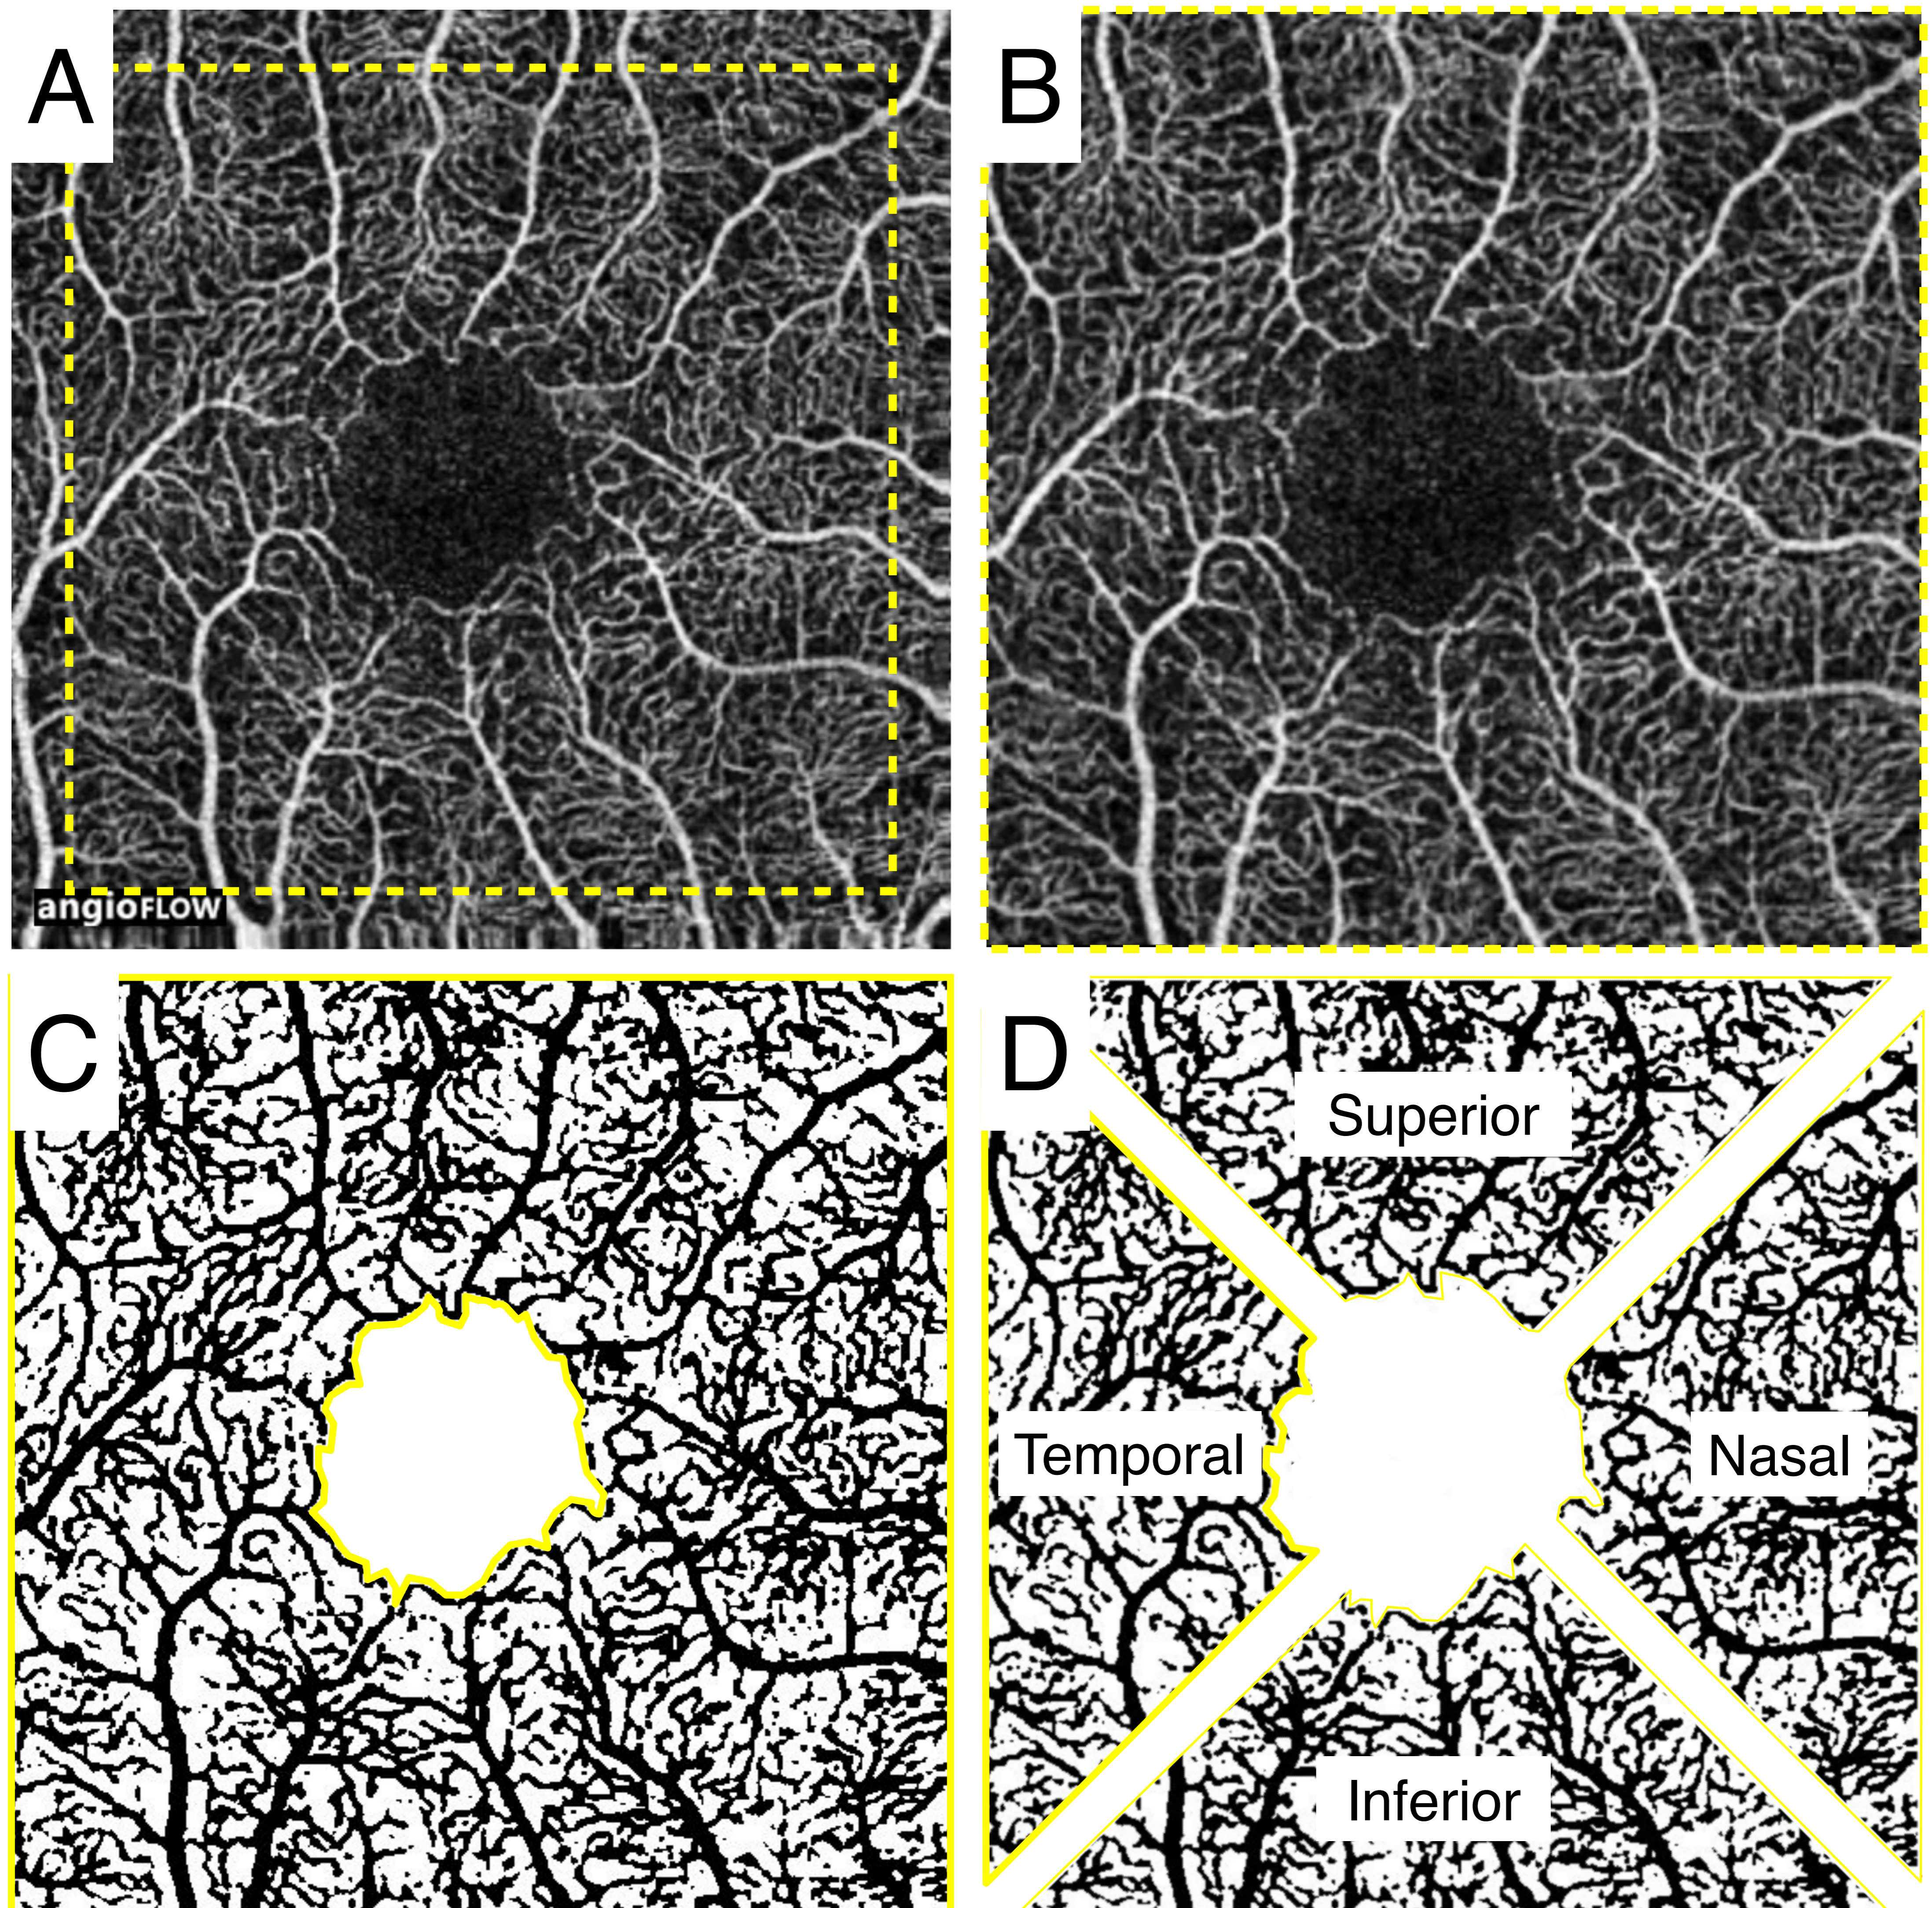

**Supplemental Fig. 1.** Quantification of flow density in OCTA. The OCTA image of a 45-year-old man at the SCP. (A) A 3 X 3 mm en face OCTA was cropped to 2.6 X 2.6 mm using an image editing program (Adobe Systems, Inc.; yellow dotted square) to avoid the influence of the “angioFLOW” display on quantification. (B) A 2.6 X 2.6 mm en face OCTA image used for this study. (C) Image binarization was performed using NI Vision. (D) Each image was uniformly divided into four regions (superior, inferior, nasal and temporal sides).
